# Supplementary material for: Prediction of dielectric constants of ABO3-type perovskites using machine learning and first-principles calculations
Source: Royal Society of Chemistry journal article supplement (doi:10.1039/d1cp04702g), 2022-01-01
Supplement: d1cp04702g1.pdf [file d1cp04702g1.pdf]

## SUPPORTING INFORMATION

### **Prediction of Dielectric Constants of $ABO_3$ -Type Perovskites Using Machine Learning and First-Principle Calculations**

Eunsong Kim, Joonchul Kim, and Kyoungmin Min\*

School of Mechanical Engineering, Soongsil University, 369 Sangdo-ro, Dongjak-gu, Seoul  
06978, Republic of Korea



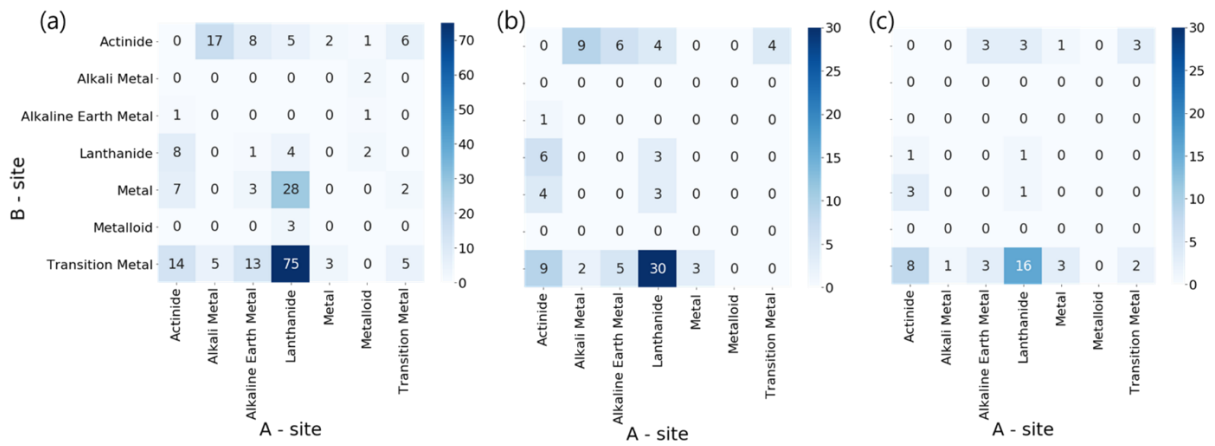

Figure S2. (a) A- and B-site element groups of the 216 calculated ABO<sub>3</sub> perovskites, (b) 89 perovskites with values over the median of the dielectric constants, and (c) 49 structures with values over the median values for both electronic and ionic contributions.

| Materials group                                 | Properties                             | Algorithms        | Reference |
|-------------------------------------------------|----------------------------------------|-------------------|-----------|
| ABO <sub>3</sub> perovskites                    | Thermodynamic stability                | ET and KRR        | [1]       |
|                                                 | Stable, metastable                     | GBDT              | [2]       |
|                                                 | Formability, cubic structure stability | RF and GBR        | [3]       |
|                                                 | Formation energy, bandgap              | GBR               | [4]       |
|                                                 | Curie temperature                      | SVM               | [5]       |
|                                                 | Maximum magnetic entropy change        | GPR               | [6]       |
|                                                 | Ionic conductivity                     | SVM               | [7]       |
|                                                 | Specific surface area (SSA)            | SVM               | [8]       |
| ABX <sub>3</sub> perovskites                    | Stability                              | GBR and CNN       | [9]       |
|                                                 | Bandgap                                | ACE               | [10]      |
|                                                 | Stability                              | ERT               | [11]      |
|                                                 | Formability and stability              | SVM               | [12]      |
|                                                 | Formability and interfacial properties | SVM               | [13]      |
|                                                 | Phase stability                        | XGBoost           | [14]      |
|                                                 | Bandgap                                | RF                | [15]      |
|                                                 | Dielectric breakdown strength          | KRR, RF and LASSO | [16]      |
| Stability, bandgap and spontaneous polarization | GBC and GBR                            | [17]              |           |

Table S2. Previous studies for predicting materials properties of ABO<sub>3</sub> and ABX<sub>3</sub> perovskites. [18]

| Materials group                      | Total dielectric tensor | Electronic contribution | Ionic contribution | Reference |
|--------------------------------------|-------------------------|-------------------------|--------------------|-----------|
| Ternary oxides                       | ○                       | ○                       | ○                  | [19]      |
| Inorganic compounds                  | ○                       | ○                       | ○                  | [20]      |
| Binary non-oxides, ternary fluorides | ○                       | ○                       | ○                  | [21]      |
| Inorganic materials                  | ○                       | -                       | -                  | [22]      |
| Metal oxides                         | ○                       | ○                       | ○                  | [23]      |

**Table S3.** Previous database for dielectric constants using DFPT calculations

## REFERENCES

- [1] W. Li, R. Jacobs, and D. Morgan, "Predicting the thermodynamic stability of perovskite oxides using machine learning models," *Comput. Mater. Sci.*, vol. 150, no. January, pp. 454–463, 2018, doi: 10.1016/j.commatsci.2018.04.033.
- [2] H. Liu *et al.*, "Screening stable and metastable ABO<sub>3</sub> perovskites using machine learning and the materials project," *Comput. Mater. Sci.*, vol. 177, no. January, p. 109614, 2020, doi: 10.1016/j.commatsci.2020.109614.
- [3] P. V Balachandran, A. A. Emery, J. E. Gubernatis, T. Lookman, C. Wolverton, and A. Zunger, "Predictions of new ABO<sub>3</sub> perovskite compounds by combining machine learning and density functional theory," *Phys. Rev. Mater.*, vol. 2, no. 4, p. 43802, Apr. 2018, doi: 10.1103/PhysRevMaterials.2.043802.
- [4] L. Chen, "A progressive learning method for predicting the band gap of ABO<sub>3</sub> perovskites using an instrumental," pp. 3127–3136, 2020, doi: 10.1039/c9tc06632b.
- [5] X. Zhai, M. Chen, and W. Lu, "Accelerated search for perovskite materials with higher

- Curie temperature based on the machine learning methods," *Comput. Mater. Sci.*, vol. 151, no. April, pp. 41–48, 2018, doi: 10.1016/j.commatsci.2018.04.031.
- [6] Y. Zhang and X. Xu, "Machine learning the magnetocaloric effect in manganites from lattice parameters," *Appl. Phys. A Mater. Sci. Process.*, vol. 126, no. 5, pp. 1–12, 2020, doi: 10.1007/s00339-020-03503-8.
- [7] L. Xu, L. Wencong, P. Chunrong, S. Qiang, and G. Jin, "Two semi-empirical approaches for the prediction of oxide ionic conductivities in ABO<sub>3</sub> perovskites," *Comput. Mater. Sci.*, vol. 46, no. 4, pp. 860–868, 2009, doi: 10.1016/j.commatsci.2009.04.047.
- [8] L. Shi, D. Chang, X. Ji, and W. Lu, "Using Data Mining to Search for Perovskite Materials with Higher Specific Surface Area," *J. Chem. Inf. Model.*, vol. 58, no. 12, pp. 2420–2427, 2018, doi: 10.1021/acs.jcim.8b00436.
- [9] X. Li *et al.*, "Computational screening of new perovskite materials using transfer learning and deep learning," *Appl. Sci.*, vol. 9, no. 24, 2019, doi: 10.3390/app9245510.
- [10] V. Gladkikh, D. Y. Kim, A. Hajibabaei, A. Jana, C. W. Myung, and K. S. Kim, "Machine Learning for Predicting the Band Gaps of ABX<sub>3</sub> Perovskites from Elemental Properties," *J. Phys. Chem. C*, vol. 124, no. 16, pp. 8905–8918, 2020, doi: 10.1021/acs.jpcc.9b11768.
- [11] J. Schmidt, J. Shi, P. Borlido, L. Chen, S. Botti, and M. A. L. Marques, "Predicting the Thermodynamic Stability of Solids Combining Density Functional Theory and Machine Learning," *Chem. Mater.*, vol. 29, no. 12, pp. 5090–5103, Jun. 2017, doi: 10.1021/acs.chemmater.7b00156.
- [12] G. Pilania, P. V. Balachandran, C. Kim, and T. Lookman, "Finding new perovskite halides via machine learning," *Front. Mater.*, vol. 3, no. April, pp. 1–7, 2016, doi: 10.3389/fmats.2016.00019.
- [13] D. Jain, S. Chaube, P. Khullar, S. Goverapet Srinivasan, and B. Rai, "Bulk and surface DFT investigations of inorganic halide perovskites screened using machine learning and materials property databases," *Phys. Chem. Chem. Phys.*, vol. 21, no. 35, pp. 19423–19436, 2019, doi: 10.1039/c9cp03240a.

- [14] H. Park *et al.*, "Learn-and-Match Molecular Cations for Perovskites," *J. Phys. Chem. A*, vol. 123, no. 33, pp. 7323–7334, 2019, doi: 10.1021/acs.jpca.9b06208.
- [15] K. Takahashi, L. Takahashi, I. Miyazato, and Y. Tanaka, "Searching for Hidden Perovskite Materials for Photovoltaic Systems by Combining Data Science and First Principle Calculations," *ACS Photonics*, vol. 5, no. 3, pp. 771–775, Mar. 2018, doi: 10.1021/acsp Photonics.7b01479.
- [16] C. Kim, G. Pilia, and R. Ramprasad, "Machine Learning Assisted Predictions of Intrinsic Dielectric Breakdown Strength of ABX<sub>3</sub> Perovskites," *J. Phys. Chem. C*, vol. 120, no. 27, pp. 14575–14580, Jul. 2016, doi: 10.1021/acs.jpcc.6b05068.
- [17] S. Lu, Q. Zhou, L. Ma, Y. Guo, and J. Wang, "Rapid Discovery of Ferroelectric Photovoltaic Perovskites and Material Descriptors via Machine Learning," *Small Methods*, vol. 3, no. 11, pp. 1–10, 2019, doi: 10.1002/smt.201900360.
- [18] Q. Tao, P. Xu, M. Li, and W. Lu, "Machine learning for perovskite materials design and discovery," *npj Comput. Mater.*, vol. 7, no. 1, pp. 1–18, 2021, doi: 10.1038/s41524-021-00495-8.
- [19] I. Petousis *et al.*, "Data Descriptor: High-throughput screening of inorganic compounds for the discovery of novel dielectric and optical materials," *Sci. Data*, vol. 4, pp. 1–12, 2017, doi: 10.1038/sdata.2016.134.
- [20] I. Petousis *et al.*, "Benchmarking density functional perturbation theory to enable high-throughput screening of materials for dielectric constant and refractive index," *Phys. Rev. B*, vol. 93, no. 11, pp. 1–8, 2016, doi: 10.1103/PhysRevB.93.115151.
- [21] M. Lee, Y. Youn, K. Yim, and S. Han, "High-throughput ab initio calculations on dielectric constant and band gap of non-oxide dielectrics," *Sci. Rep.*, vol. 8, no. 1, pp. 1–8, 2018, doi: 10.1038/s41598-018-33095-6.
- [22] K. Morita, D. W. Davies, K. T. Butler, and A. Walsh, "Modeling the dielectric constants of crystals using machine learning," *J. Chem. Phys.*, vol. 153, no. 2, 2020, doi: 10.1063/5.0013136.

- [23] A. Takahashi, Y. Kumagai, J. Miyamoto, Y. Mochizuki, and F. Oba, "Machine learning models for predicting the dielectric constants of oxides based on high-throughput first-principles calculations," *Phys. Rev. Mater.*, vol. 4, no. 10, 2020, doi: 10.1103/PhysRevMaterials.4.103801.
